# Supplementary material for: Sphingosine 1-phosphate receptor 2 in keratinocytes plays a key role in reducing inflammation in psoriasis
Source: Front Immunol. 2024 Sep 26;15:1469829. doi: 10.3389/fimmu.2024.1469829 (PMC11464331; doi:10.3389/fimmu.2024.1469829)
Supplement: Supplementary file 2 [file Table1.xlsx]

## Sheet: Table S1
Supplementary Table S1. Real-Time qPCR Primer List for TaqMan Fast Advanced Master Mix
Strain	Gene	TaqMan Assay ID
Mouse	Gapdh	Mm99999915_g1
	Tnf-α	Mm00443258_m1
	Il-17a	Mm00439618 m1
	Il-1β	Mm00434228_m1
	Tlr7	Mm00446590_m1
	Myd88	Mm00440338_m1
	Traf6	Mm00493836_m1
	Irf7	Mm00516793_g1
	Nfkb1	Mm00476361_m1
	Rela	Mm00501346_m1
	Flg	Mm01716522_m1
	Flg2	Mm02744902_g1
	Cdsn	Mm01275230_m1
Human	GAPDH	Hs99999905_m1
	TNF-α	Hs00765730_m1
	IL-17C	Hs00171163_m1
	IL-1β	Hs01555410_m1
	MYD88	Hs00182082_m1
	TRAF6	Hs00371512_g1
	IRF7	Hs00185375_m1
	NFKB1	Hs00765730_m1
	RELA	Hs00153294_m1

## Sheet: Table S2
Supplementary Table S2. Real-Time qPCR Primer List for PowerUp SYBR Green Master Mix
Gene	Forward Primer Sequence (3'-5')	Reverse Primer Sequence (5'-3')
Gapdh	CTTAGCACCCCTGGCCAAG	TGGTCATGAGTCCTTCCACG
S1pr2	GCGTGGTCACCATCTTCTCC	CGTCTGAGGACAGCAACATC
Cldn1	AGACCTGGATTTGCATCTTGGTG	TGCAACATAGGCAGGACAAGAGTTA
Ocln	GCTTATCTTGGGAGCCTGGACA	GTCATTGCTTGGTGCATAATGATTG

## Sheet: Table S3
Supplementary Table S3. Antibody List for Immunofluorescence staining
Antibody		Product Description	Dilution	Catalog No.	Source
Primary	Ly6G/Ly6C (clone RB6-8C5)	Rat, monoclonal	1:50	14-5931-82	Invitrogen, Waltham, MA
	TLR7 (clone 4G6)	Mouse, monoclonal	1:500	MA5-16247	Invitrogen, Waltham, MA
Secondary	Alexa Fluor 594 IgG	Goat, anti-rat	1:500	A11007	Invitrogen, Waltham, MA
	Alexa Fluor 488 F(ab')2 IgG	Goat, anti-mouse	1:1000	A-10684	Invitrogen, Waltham, MA
